# Supplementary material
Source: PubMed Central journal article supplement (PMC5885901)
Supplement: jamaophthalmol-136-279-s002.pdf [file jamaophthalmol-136-279-s002.pdf]

## Supplementary Online Content

Cromelin CH, Drews-Botsch C, Russell B, Lambert SR; Infant Aphakia Treatment Study Group. Association of contact lens adherence with visual outcome in the Infant Aphakia Treatment Study: a secondary analysis of a randomized clinical trial. Published February 8, 2018. *JAMA Ophthalmol*. doi:10.1001/jamaophthalmol.2017.6691

**eFigure 1.** Reported Percentage of Waking Hours Spent Wearing Contact Lenses from Age 1 to 5 Years vs Sex in the Infant Aphakia Treatment Study

**eFigure 2.** Reported Percentage of Waking Hours Spent Wearing Contact Lenses From Age 1 to 5 Years as a Function of Private vs Public Health Insurance in the Infant Aphakia Treatment Study

**eFigure 3.** Reported Percentage of Waking Hours Spent Wearing Contact Lenses From Age 1 to 5 Years vs Age at Cataract Surgery (<49 days vs 49 days or older) in the Infant Aphakia Treatment Study

This supplementary material has been provided by the authors to give readers additional information about their work.

**eFigure 1.** Reported Percentage of Waking Hours Spent Wearing Contact Lenses from Age 1 to 5 Years vs Sex in the Infant Aphakia Treatment Study

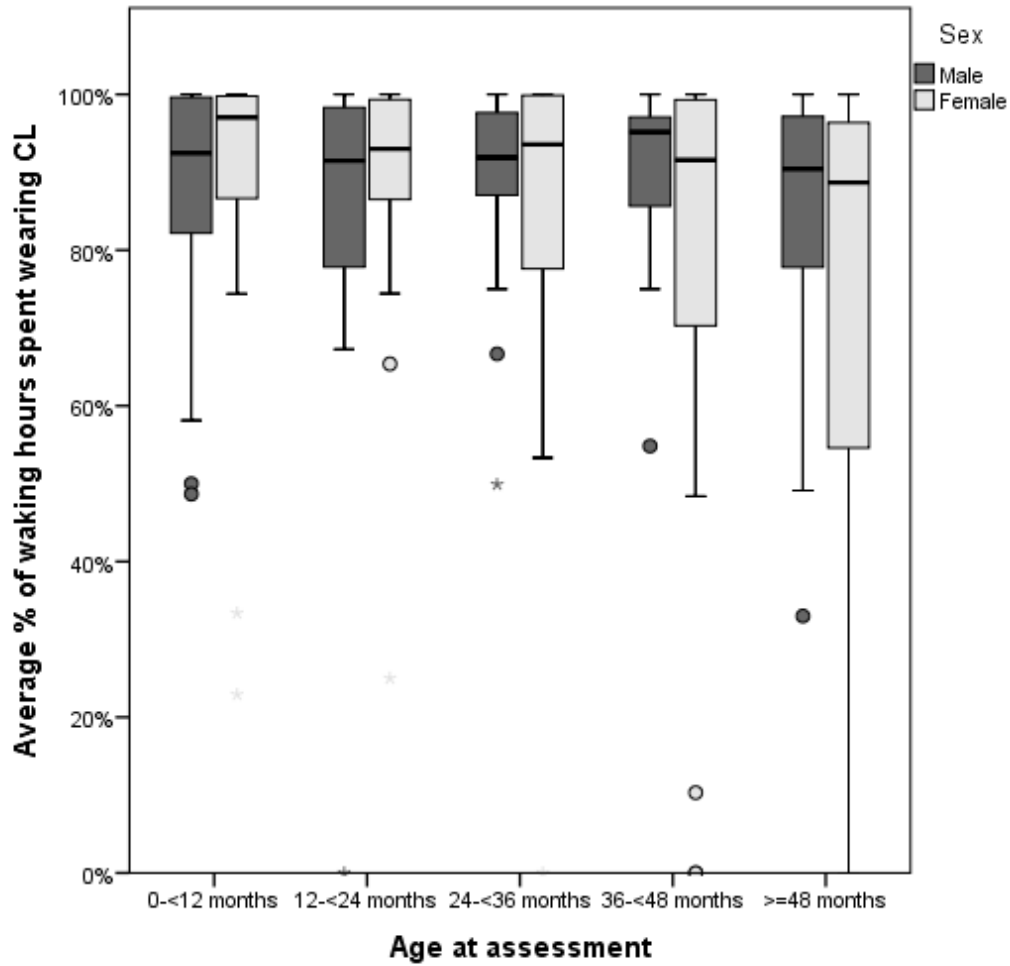

The horizontal line in the middle of the box indicates median; top and bottom borders of the boxes 75th and 25th percentiles; whiskers 2 SD from median; data points shown as circles, outliers and asterisks, extreme outliers.

**eFigure 2.** Reported Percentage of Waking Hours Spent Wearing Contact Lenses From Age 1 to 5 Years as a Function of Private vs Public Health Insurance in the Infant Aphakia Treatment Study

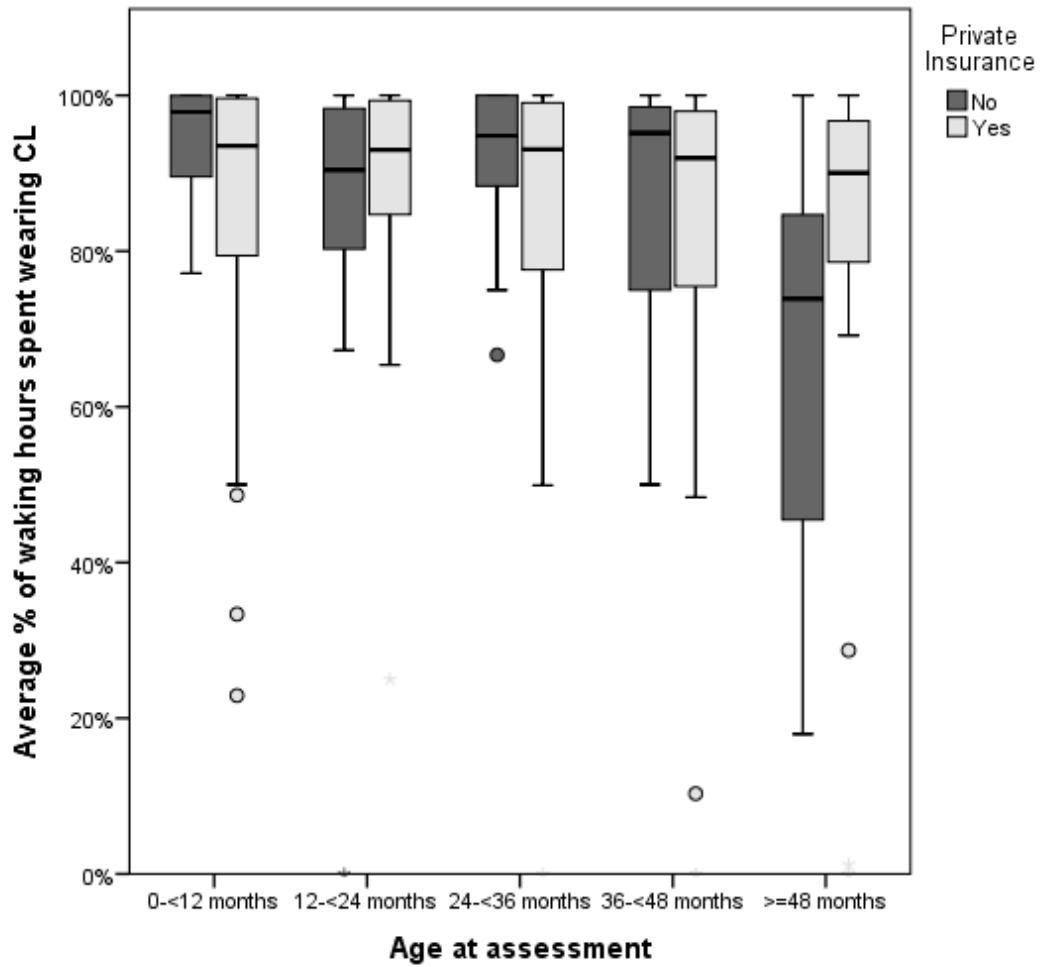

The horizontal line in the middle of the box indicates median; top and bottom borders of the boxes 75th and 25th percentiles; whiskers 2 SD from median; data points shown as circles, outliers.

**eFigure 3.** Reported Percentage of Waking Hours Spent Wearing Contact Lenses From Age 1 to 5 Years vs Age at Cataract Surgery (<49 days vs 49 days or older) in the Infant Aphakia Treatment Study

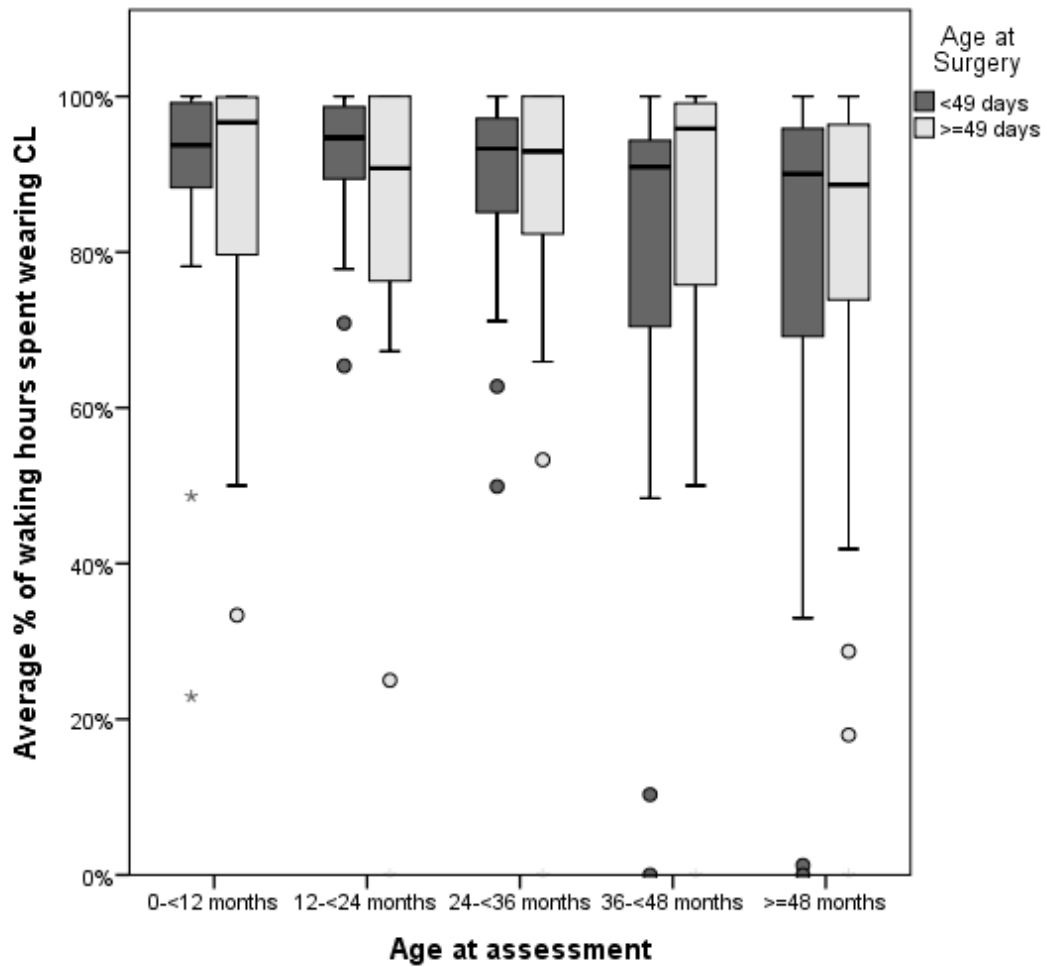

The horizontal line in the middle of the box indicates median; top and bottom borders of the boxes 75th and 25th percentiles; whiskers 2 SD from median; data points shown as circles, outliers and asterisks, extreme outliers.
